# 1 **Phylogenetic scale in ecology and evolution**

2 **Catherine H. Graham** <sup>1</sup>, **Antonin Machac** <sup>2,3,4</sup>, **David Storch** <sup>3,4</sup>

3

4 <sup>1</sup>Department of Ecology and Evolution, 650 Life Sciences Bldg, Stony Brook University, Stony  
5 Brook, NY 11794, USA – <sup>2</sup>Center for Macroecology, Evolution, and Climate, Natural History  
6 Museum of Denmark, Universitetsparken 15, DK 2100 Copenhagen – <sup>3</sup>Department of Ecology,  
7 Vinicna 7, 12844 Prague 2, Czech Republic – <sup>4</sup>Center for Theoretical Study, Jilska 1, 11000 Prague  
8 1, Czech Republic.

9

10 Email contacts: CHG: [catherine.graham@stonybrook.edu](mailto:catherine.graham@stonybrook.edu), AM: [A.Machac@email.cz](mailto:A.Machac@email.cz), DS:  
11 [storch@cts.cuni.cz](mailto:storch@cts.cuni.cz). Author for correspondence: Catherine H. Graham, telephone (US 1-631-632-  
12 1962), fax (US 1-631-632-7626). Statement of authorship: The authors conceived and wrote the  
13 manuscript together, contributing equally.

14

15 Running title: Phylogenetic scale in ecology and evolution. Keywords: biogeography, community  
16 structure, diversification, domains of scale, extent, grain, macroecology, macroevolution, spatial  
17 scale. The text consists of 5200 words, 2 boxes (~420 words each), 1 figure, 1 table, 100 references

18

19

20

21

22

## 23 SUMMARY

24 It has been widely acknowledged that many phenomena in ecology and evolution depend on  
25 spatial and temporal scale. However, important patterns and processes may vary also across the  
26 phylogeny and depend on phylogenetic scale. Though phylogenetic scale has been implicitly  
27 considered in some previous studies, it has never been formally conceptualized and its potential  
28 remains unexplored. Here, we develop the concept of phylogenetic scale and, building on  
29 previous work in the field, we introduce phylogenetic grain and extent, phylogenetic scaling and  
30 the domains of phylogenetic scale. We use examples from published research to demonstrate how  
31 phylogenetic scale has been considered so far and illustrate how it can inform, and possibly  
32 resolve, some of the longstanding controversies in evolutionary biology, community ecology,  
33 biogeography and macroecology. To promote the concept of phylogenetic scale empirically, we  
34 propose methodological guidelines for its treatment.

35

36

37

38

39

40

41

42

43

44

45

46

47

48

49

50

51

52

## 53 INTRODUCTION

54

55 Numerous patterns in ecology and evolution vary across the phylogenetic hierarchy (Fig. 1).  
56 Species diversity declines with latitude across higher taxa but not necessarily across their  
57 constituent families and genera (Buckley *et al.* 2010) that also often conform to very different  
58 diversification dynamics (Phillimore & Price 2008; Morlon *et al.* 2010; Rabosky *et al.* 2012).  
59 Phylogenetic delimitation of species pools determines our inferences about community assembly  
60 (Cavender-Bares *et al.* 2009). Many other, similar examples can further illustrate that patterns in  
61 ecology and evolution often depend on phylogenetic scale (Fig. 1). Yet, unlike the extensively  
62 developed and widely recognized concepts of spatial and temporal scale (e.g. Wiens 1989; Levin  
63 1992; Schneider 2001), phylogenetic scale remains largely unnoticed and its importance has only  
64 recently been emerging. Here, we formalize and develop the concept of phylogenetic scale,  
65 summarize how it has been considered across disciplines, provide empirical guidelines for the  
66 treatment of phylogenetic scale, and suggest further research directions.

67       Inspired by the concept of spatial scale (e.g. Wiens 1989; Levin 1992; Schneider 2001), we  
68 define phylogenetic scale in terms of phylogenetic grain and phylogenetic extent. Phylogenetic  
69 grain refers to the elementary unit of analysis, defined in terms of tree depth, taxonomic rank,  
70 clade age, or clade size. Phylogenetic extent refers to the entire phylogeny encompassing all these  
71 units (Box 1). The grain and extent of biological patterns might inform us about the mechanisms  
72 that produced these patterns. For example, the number of families in the fossil record seems to  
73 stay constant while the number of genera seems to increase continually over geological time,  
74 suggesting that different mechanisms produce genus-level and family-level diversity (Benton &  
75 Emerson 2007). In community ecology, clade-wide analyses typically suggest that communities  
76 have been shaped by environmental filters (Parra *et al.* 2011) while focused analyses of narrowly  
77 defined clades often uncover a suite of additional mechanisms (e.g. competition, mutualisms,  
78 dispersal limitation) (Parra *et al.* 2011; McGuire *et al.* 2014). Different patterns, and by extension  
79 different inferences about the underlying mechanisms, might therefore emerge across the  
80 continuum of phylogenetic scales.

81       The concept of phylogenetic scale seems particularly pertinent, given the growing body  
82 of research and statistical methods to explore the increasingly accurate and ever more complete

83 phylogenetic data (e.g. phylogenetic comparative methods, community phylogenetics,  
84 diversification analysis). Yet, few studies have extended the explorative strategies to  
85 systematically investigate phylogenetic patterns across scales (e.g. upscaling, downscaling),  
86 delimit biologically consistent domains of scale (e.g. morphologically, ecologically,  
87 geographically distinct segments of the phylogeny), or test the universal laws of ecology (e.g.  
88 species-abundance distributions, latitudinal gradients). We therefore contend that the full  
89 potential of the phylogenetic data and the methods at hand has not yet been realized, and further  
90 progress might be precipitated by a more focused and formalized treatment of phylogenetic scale,  
91 akin to the one commonly applied across temporal and spatial scales (e.g. Wiens 1989; Levin 1992;  
92 Schneider 2001).

93         Here, we summarize the variety of ways in which different disciplines have either  
94 implicitly or explicitly considered phylogenetic scale, highlighting their respective benefits and  
95 pitfalls. We further propose how these efforts might be consolidated under one conceptual and  
96 empirical framework that would provide the common ground for cross-disciplinary discussion.  
97 In particular, we define the concept of phylogenetic scale, distinguish between phylogenetic grain  
98 and extent, scale-dependence, phylogenetic scaling and the domains of scale. We also provide  
99 practical guidelines for the treatment of phylogenetic scale across empirical studies, using the  
100 data and statistical methods currently available. We hope this will inspire further discussion,  
101 draw more focused attention to the subject, and advance the notion of phylogenetic scale in  
102 ecology and evolution.

103

## 104 **PHYLOGENETIC SCALE IN ECOLOGY AND EVOLUTION**

105 Phylogenetic scale has been considered to varying degrees in ecology and evolution, from being  
106 largely neglected to being relatively well-developed. In this section, we describe previous  
107 research that has implicitly or explicitly considered phylogenetic scale but also how the core  
108 disciplines in the field might further benefit from this concept (e.g. macroevolution, community  
109 ecology, biogeography, macroecology).

110

111

112

113 **Figure 1.** Examples of patterns that vary across phylogenetic scales. (a) The latitudinal diversity  
114 gradient. Mammal diversity decreases with latitude across large clades but many other patterns  
115 emerge across small clades, including inverse ones (select clades depicted in black). (b) The  
116 dependence of population abundance on body mass. The dependence is negative across large  
117 phylogenetic scales (mammals depicted in grey) but varies substantially across small scales (select  
118 orders depicted in black). (c) Diversification dynamics. Slowdowns detected over some  
119 phylogenetic scales might be accompanied by accelerations over both larger and smaller scales.  
120 (d) Statistical correlations. Even though the depicted variables are negatively correlated within  
121 each of the two subclades, the correlation becomes positive when the subclades are studied  
122 together. The data (a, b) were taken from the IUCN (2016) and PanTHERIA (2016).

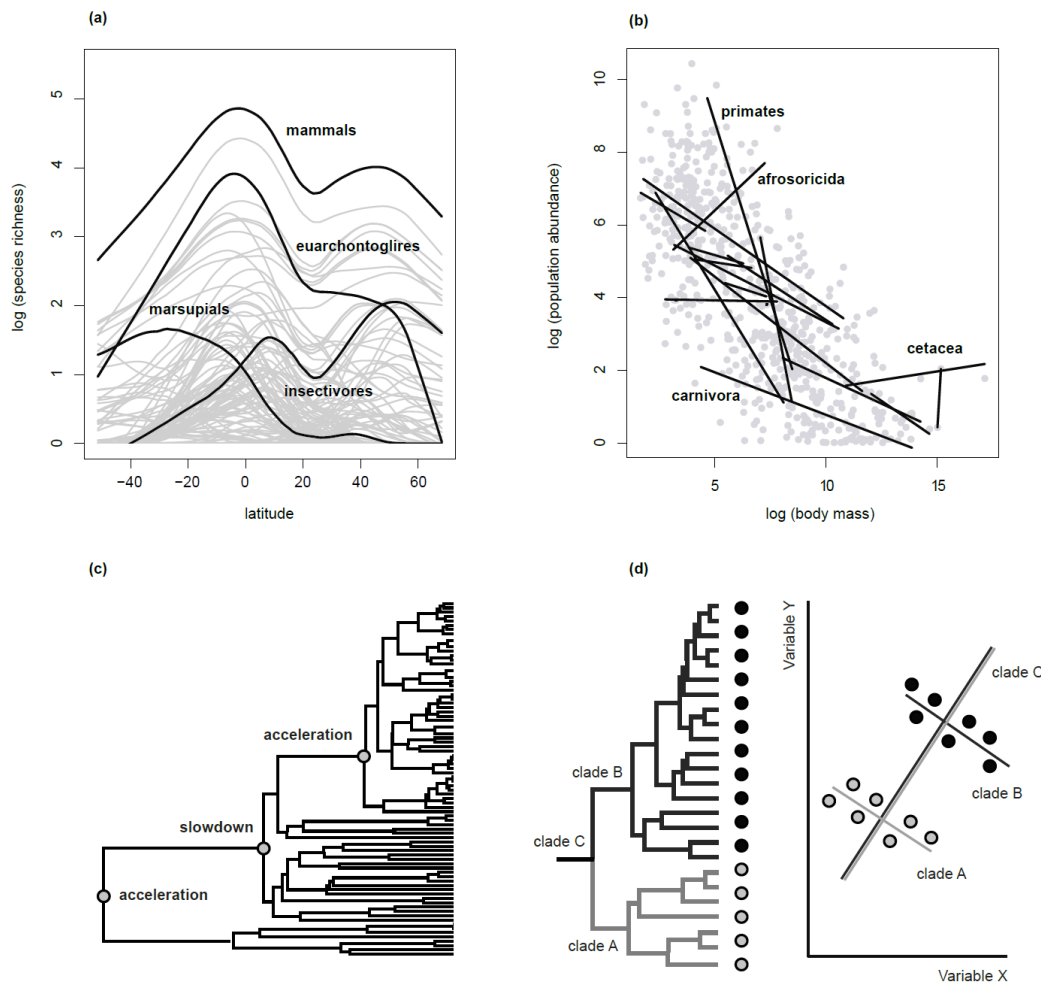

## 123 **BOX 1: The concept of phylogenetic scale**

124 The concept of scale is based on the fact that some entities can be ordered, or placed on a scale  
125 (*scala* means *ladder* in Latin). For example, continents contain biomes, ecoregions, and localities,  
126 giving rise to spatial hierarchy. Similarly, large clades contain small clades, creating phylogenetic  
127 hierarchy which defines phylogenetic scale. However, clades are not always nested, in which case  
128 standard measures might be needed to order the clades along the scale continuum. These  
129 measures might include time (clade age) but also clade size (number of species within a clade) or  
130 the degree of molecular, phenotypic, or ecological divergence within a clade. These measures will  
131 be inherently correlated across mutually nested clades but might become decoupled across non-  
132 nested clades (e.g. old clades will not necessarily be most diverse) (Box 2).

133 In the concept of spatial scale, **grain** and **extent** are usually distinguished. Grain refers to the area  
134 of the basic unit analyzed (e.g. ecoregion) while extent refers to the total area analyzed (e.g.  
135 continent). Phylogenetic scale can be defined analogically, such that phylogenetic grain refers to  
136 the basic unit of analysis (e.g. species, genera, families) and phylogenetic extent to the total  
137 phylogeny that would encompass all the units analyzed (e.g. class, phylum).

138 Even though taxonomic ranks are commonly used to define phylogenetic scale, they are not  
139 always comparable (e.g. genera in mammals are not comparable to genera in insects), and  
140 standard measures might be better suited to define phylogenetic scales across distant taxa (e.g.  
141 taxon age, taxon size), but even these measures might not ensure entirely that the analyzed taxa  
142 are fully comparable. For example, clade age might reflect the degree of phenotypic divergence  
143 across clades, but some clades might be more diverged than others despite being of similar age.

144 The same limitations apply to the measures of spatial scale because spatial grains of standardized  
145 sizes might not ensure comparability across species of dramatically different geographic and  
146 home range sizes (Wiens 1989). Therefore, the most suitable measure and definition of the  
147 phylogenetic scale should be dictated by the biological properties of the organismal system (e.g.  
148 body size, generation time, rates of phenotypic evolution) and the question under study (e.g.  
149 phenotypic divergence, diversification dynamics, diversity patterns).

150 In some cases, it may be useful to work with non-standardized grains which represent more  
151 natural units of analysis (e.g. islands in spatial scaling or island faunas in phylogenetic scaling).

152 The extents will then be defined correspondingly, so as to cover all of the units analyzed (e.g. all  
153 islands or the entire biotas across islands). Finally, grain and extent are defined only in relation  
154 to each other. The grain from one study can therefore act as an extent in another study, or vice  
155 versa.

156

157

## 158 **Evolution and diversification**

159 Evolutionary diversification and disparification are known to vary across phylogenetic scales but  
160 have rarely been thoroughly studied in this context. Even though a suite of methods are  
161 commonly used to explore these processes across the phylogeny (e.g. Rabosky *et al.* 2012; Alfaro  
162 *et al.* 2009) (see Table 1), most studies report the recovered patterns without a focused examination  
163 of their scale-dependence. Focused examination of patterns across scales may precipitate the  
164 resolution of several outstanding controversies in the field.

165 One such controversy revolves around the dynamics of diversity and diversification. It  
166 has been debated whether the dynamics are expansionary, such that regional and clade diversity  
167 accumulate constantly over time (Benton & Emerson 2007; Wiens 2011; Harmon & Harrison  
168 2015), or whether the dynamics are ecologically limited, such that diversity tends toward an  
169 equilibrium (Rabosky 2009; Rabosky & Hurlbert 2015). Empirical evidence suggests that genera  
170 with dozens of species often expand in terms of their diversity (McPeck 2008; Morlon *et al.* 2010)  
171 whereas higher taxa with thousands of species are mostly saturated at their equilibrium diversity  
172 (Vamosi & Vamosi 2010; Rabosky *et al.* 2012). Island radiations and fossil evidence also indicate  
173 that clades often expand, seemingly without bounds, during the initial phases of their  
174 diversification but eventually reach an equilibrium and saturate (Alroy 1996; Benton & Emerson  
175 2007; Glor 2010; Quental & Marshall 2013). It is therefore possible that diversification varies  
176 systematically across phylogenetic scales such that seemingly contradictory dynamics (i.e.  
177 expansionary and equilibrational) might be detected even across different segments of the same  
178 phylogenetic tree. If that were the case, the debate as to whether the dynamics are expansionary  
179 or equilibrational might not prove particularly productive and should perhaps be reframed in terms  
180 of phylogenetic scale (e.g. phylogenetic scales over which the different dynamics prevail, scale-

181 related factors that determine the shift between the dynamics, how the dynamics combine across  
182 scales and across nested clades of different ages and sizes).

183 Evolutionary disparification may also vary across the phylogeny because traits  
184 (phenotypic, behavioral, but also molecular) diverge at different rates and therefore are  
185 conserved over different phylogenetic scales (Freckleton *et al.* 2002; Blomberg *et al.* 2003; Wiens &  
186 Graham 2005). Even though the dynamics of trait divergence and niche conservatism have been  
187 the subject of much research (e.g. Blomberg *et al.* 2003; Freckleton *et al.* 2002), clear generalizations  
188 about their scale-dependence have not yet emerged. In most cases, physiological traits that largely  
189 determine the extent of species distributions seem conserved over extensive phylogenetic scales  
190 (Freckleton *et al.* 2002; Blomberg *et al.* 2003) while habitat- and diet-related traits that mediate  
191 species coexistence locally seem generally labile and conserved over small scales (Ackerly *et al.*  
192 2006; Buckley *et al.* 2010). However, the opposite pattern has also been observed where  
193 physiological tolerances were conserved over small scales while habitat, diet, body size, and  
194 feeding method remained unchanged for most of a clade's history (Kennedy *et al.* 2012; Price *et*  
195 *al.* 2014).

196 These mixed results suggest that temporal scale may be insufficient to fully capture the  
197 variance in niche conservatism. Phylogenetic scale, in contrast, captures the fact niches and traits  
198 may evolve at different rates even across closely related clades (e.g. due to clade-specific selection  
199 regimes, genetic architecture, pleiotropy) than span similar temporal scales but different  
200 phylogenetic scales (e.g. one clade has undergone an explosive radiation on an island while the  
201 other has accumulated only limited morphological, ecological, and species diversity on the  
202 mainland). In these cases, time will not capture the phylogenetic hierarchy as well as phylogenetic  
203 scale would (e.g. phylogenetic domains defined in terms of clade size, phenotypic and ecological  
204 divergence; see below). The concept of phylogenetic scale may therefore encourage a more  
205 realistic and potentially more accurate way of thinking about trait evolution and niche  
206 conservatism.

207

## 208 **Community ecology**

209 Patterns of community phylogenetic structure, and hence the inferred processes that shape  
210 communities, can vary with phylogenetic scale (Webb *et al.* 2002; Cavender-Bares *et al.* 2009;



211 Vamosi *et al.* 2009; Münkemüller *et al.* 2014). Even though community phylogeneticists have long  
212 been aware of this fact (Webb *et al.* 2002; Cavender-Bares *et al.* 2009), most studies routinely do  
213 not recognize the influence of phylogenetic scale on their results.

214 To study the phylogenetic structure of a community, researchers calculate standardized  
215 community metrics (e.g. the net relatedness index, NRI) that compare the observed values to the  
216 null expectation based a model in which species are drawn randomly from the regional species  
217 pool. Phylogenetic delimitation of the species pool can influence the results and provide insights  
218 into the mechanisms that mediate local coexistence of different suites of species (Cavender-Bares  
219 *et al.* 2009; Lessard *et al.* 2012; Cornell & Harrison 2014). For example, environmental filters seem  
220 to form the communities that consist of mutually unrelated species selected from a broadly  
221 defined regional species pool (Parra *et al.* 2011; Cavendar-Bares *et al.* 2009) while narrowly defined  
222 pools typically uncover signatures of competition, mutualism, or dispersal limitation among  
223 closely related and locally coexisting species (Swenson *et al.* 2007; Cavender-Bares *et al.* 2009;  
224 Parra *et al.* 2011).

225 The interpretation of community structure has been under increasing scrutiny lately  
226 because different processes can produce similarly-structured communities (e.g. Mayfield &  
227 Levine 2010; Gerhold *et al.* 2015) and a single metric may not capture community structure well  
228 enough to identify the processes that produced the community (Gerhold *et al.* 2015). We argue  
229 that using multiple metrics across phylogenetic scales, along the lines of some recently developed  
230 statistical approaches (Leibold *et al.* 2010; Pavoine *et al.* 2010; Borregaard *et al.* 2014), could be a  
231 particularly powerful strategy to capture community structure more completely and disentangle  
232 the interplay of processes behind it. Moreover, we would also recommend that the results are  
233 complemented by experimental work whenever possible (Cadotte *et al.* 2013; Godoy *et al.* 2014).  
234 Community ecology represents one of the disciplines where patterns and processes have already  
235 been analyzed in relation to phylogenetic scale, illustrating the theoretical and empirical potential  
236 of the concept. Further advances on this front are certainly possible (e.g. analysis of multiple  
237 community metrics across phylogenetic scales) and hold the promise of a more conclusive  
238 interpretation of community-level patterns and the ecological processes behind them.

239

240

## 241 **Biogeography and niche conservatism**

242 Biogeographic patterns, such as species distributions and diversity gradients, are largely shaped  
243 by the conservatism of the ecological niche (Wiens & Graham 2005; Wiens *et al.* 2010), which  
244 varies across the different dimensions of the niche and across phylogenetic scales (Freckleton *et*  
245 *al.* 2002; Wiens & Graham 2005). Instead of studying whether niches are conserved or not  
246 (Freckleton *et al.* 2002; Wiens & Graham 2005; Losos 2008; Wiens 2008), we should perhaps  
247 identify the scales over which they are conserved and study the imprints of these phylogenetic  
248 scales in biogeographic patterns.

249 Diversity gradients vary dramatically across taxa (Fig. 1), presumably because the taxa's  
250 climatic niches are conserved over different phylogenetic scales (Wiens & Donoghue 2004;  
251 Buckley *et al.* 2010). In mammals, many of the ancient lineages have failed to colonize high  
252 latitudes (e.g. treeshrews, sloths, armadillos) presumably because their physiological tolerances  
253 have been conserved over larger phylogenetic scales than those of the lineages that have not only  
254 invaded high latitudes but also accumulated most of their diversity there (e.g. rabbits and hares)  
255 (Buckley *et al.* 2010), producing reverse latitudinal gradients (e.g. Cook 1969; Owen & Owen 1974;  
256 Buckley *et al.* 2003; reviewed in Kindlman *et al.* 2007). The occasional breakdowns of niche  
257 conservatism, which typically span only a short period in the history of a clade and limited  
258 phylogenetic scales, sometimes precipitate diversification episodes that significantly enrich the  
259 diversity of the regional biota (e.g. African cichlids, Madagascan vangas, or ray-finned fishes and  
260 angiosperm plants) (Gavrilets & Losos 2009; Glor 2010; Jonsson *et al.* 2012; Rabosky *et al.* 2013).  
261 The phylogenetic scale over which niches are conserved, or break away from the conservatism,  
262 may consequently contribute to the formation of diversity patterns.

263 Diversity patterns may be further influenced by the effects of niche conservatism on  
264 regional extinctions (Cahill *et al.* 2012). Many genera whose climatic niches were conserved over  
265 phylogenetic scales that extended beyond the timeframe of the climatic changes during  
266 Pleistocene were wiped out by these changes (e.g. North American trees, European megafauna)  
267 (Stuart 1991; Jackson & Weng 1999). Yet, Pleistocene changes in climate have exterminated only  
268 few families, perhaps because climatic niches are less conserved at the family-level than at the  
269 genus-level (Freckleton *et al.* 2002; Blomberg *et al.* 2003). The extinction footprint of climate change  
270 therefore likely depends on the phylogenetic scale at which climatic niches are conserved.

271 Evaluating scale-dependent vulnerability to extinction seems particularly relevant in the face of  
272 the on-going worldwide changes in climate and land use, and the results might provide insights  
273 into the patterns of loss of phylogenetic diversity. Even though it has long been recognized that  
274 niches are conserved to varying degrees, few studies have systematically investigated this  
275 variation across phylogenetic scales despite the promise that such an investigation could extend  
276 our understanding of biodiversity patterns.

277

## 278 **Macroecology**

279 Macroecologists, concerned mostly with statistical patterns across large spatial and temporal  
280 scales, rarely consider phylogenetic scale in their research. Yet, cross-scale comparisons can  
281 identify statistical patterns (e.g. latitudinal diversity gradient, body size distributions, species-  
282 area relationship, species-abundance distributions) that are truly universal and those that  
283 disintegrate over certain phylogenetic scales (Marquet *et al.* 2004; Storch & Šizling 2008).  
284 Phylogenetic scale may therefore inform us about the generality of statistical patterns in ecology  
285 and about the mechanisms (e.g. mathematical, geometric, random sampling, or biological) that  
286 likely produced them (Marquet *et al.* 2004; McGill 2008).

287         Some of the patterns originally considered to be universal have later been reported to  
288 disintegrate across phylogenetic scales. The latitudinal diversity gradient provides a very  
289 intuitive example, where the pattern holds across most higher taxa (e.g. mammals, birds,  
290 amphibians, reptiles, plants) but often breaks down across their constituent lower taxa that  
291 encompass limited phylogenetic scales (e.g. penguins, hares, aphids, ichneumonids, Proteacea)  
292 and produce a variety of diversity gradients, including reverse ones (e.g. Cook 1969; Owen &  
293 Owen 1974; Buckley *et al.* 2003; reviewed in Kindlman *et al.* 2007) (Fig. 1a). Likewise, species  
294 abundance and body mass are negatively correlated across birds and mammals (Damuth 1981),  
295 but the correlation disappears across narrowly defined taxa (Isaac *et al.* 2011) and becomes even  
296 positive in some tribes of birds (Cotgreave 1994) (Fig. 1b). These changes in correlation  
297 coefficients across phylogenetic scales implicate the mechanisms behind the correlation. Within  
298 large phylogenetic extents, small-bodied species are locally abundant because their low metabolic  
299 requirements raise the carrying capacities of their populations (Gaston and Blackburn 1997).  
300 However, within restricted extents, local abundance becomes constrained by competition

301 between closely related species, and large-bodied species become locally abundant because of  
302 their competitive superiority, thus reversing the directionality of the correlation between body  
303 size and population abundance across phylogenetic scales (Cotgreave 1994) (Fig. 1b).

304 Moreover, the species-area relationship (SAR) and species-abundance distribution (SAD)  
305 were traditionally believed to universally conform to certain mathematical forms (the power-law  
306 function and the lognormal distribution, respectively) (Preston 1948; Rosenzweig 1995).  
307 However, if two sister clades follow power-law SARs and lognormal SADs which differ in their  
308 parameters, it can be proven mathematically that the clade containing both sister taxa cannot  
309 follow either the power-law SAR or the lognormal SAD (Storch & Šizling 2008; Šizling *et al.* 2009).  
310 Even though some of these patterns represent classic examples of ecological laws, cross-scale  
311 analyses indicate that they are not truly universal and sometimes provide insights into the  
312 biological mechanisms behind them.

313 The fact that some statistical patterns disintegrate across phylogenetic scales implies that  
314 the theories to explain these patterns, based on the universal principles of geometry and  
315 mathematics, might be fundamentally ill-founded (Storch & Šizling 2008). It is also possible that  
316 the theories pertain to certain phylogenetic scales only. This would suggest that phylogenetic  
317 scales form phylogenetic domains (Box 2) within which the processes hypothesized by our  
318 theories operate. However, the boundaries of these phylogenetic domains remain largely  
319 unexplored, and their empirical delimitation might further inform the theory (see Box 2).

320

321

322

323

324

325

326

327

328

329

330

331 **BOX 2: Research across phylogenetic scales**

332 Many attributes, such as diversification rate, niche conservatism, or community structure, vary  
333 across phylogenetic scales (Table 1). They may vary in three different ways:

334 **(a) Scale dependence** refers to the situation when the studied attribute varies across phylogenetic  
335 scales without any obvious trend. In this case, the suitable scale of investigation should be defined  
336 a priori, based on the objective of the study. The results from one scale will be difficult to  
337 extrapolate to other scales.

338 **(b) Scaling** occurs when the attribute of interest varies systematically along the scale axis. The  
339 interpretation of scaling is at least threefold, depending on the underlying mechanism (note that  
340 only one of the interpretations is biological):

341 1. **Statistical scaling** is a sample-size effect whereby the statistical power of the analysis increases  
342 with clade size. Consequently, the attribute under study appears to change systematically  
343 from small clades to large clades (e.g. Machac et al. 2013). While the inferred values of the  
344 attribute itself may be technically correct, their systematic variation across scales is  
345 biologically irrelevant.

346 2. **Methodological artifacts** result when a statistical analysis becomes increasingly misleading  
347 toward the deep nodes of the phylogeny, resulting in incorrect and potentially biased  
348 estimates for the attribute of interest (e.g. ancestral reconstructions under dispersal-  
349 vicariance models tend to suggest that the ancestor occupied all of the regions examined)  
350 (Ronquist 1997). Methodological artifacts can be mitigated under various statistical  
351 corrections or when the results are validated using supplementary data, such as fossils.

352 3. **Phylogenetic scaling in the strict sense** occurs when the studied attribute changes across scales  
353 because the underlying biological process changes. True scaling can therefore inform us  
354 about the processes which generate the patterns observed across scales. If the scaling can be  
355 described mathematically, it allows to extrapolate across scales, even those not included in  
356 the original study, i.e. *downscale* or *upscale* the patterns under study.

357 **(c) Domains of scale** refer to the segments of the phylogeny (e.g. taxonomic units, tree depth,  
358 distinct clades) within which the attribute of interest appears relatively unchanged. The attribute  
359 might change abruptly between domains, indicating changes in the underlying biological

360 processes. Therefore, it should be possible to extrapolate across phylogenetic scales within  
361 domains, but not across scales between them.

362

363 **FIGURE (BOX 2):** Numerous attributes can be studied across phylogenetic scales. These may  
364 include diversification measures, statistical relationships between ecological variables,  
365 parameters of frequency distributions, metrics that describe community phylogenetic structure,  
366 or measures of niche conservatism (see Table 1). Phylogenetic scale can be defined in terms of  
367 clade age, clade size, taxonomic rank, the degree of molecular or phenotypic divergence, etc.,  
368 depending on the question under study.

369

370

371

372

373

374

375

376

377

378

379

380

381

382

383

384

385

386

387

388

389

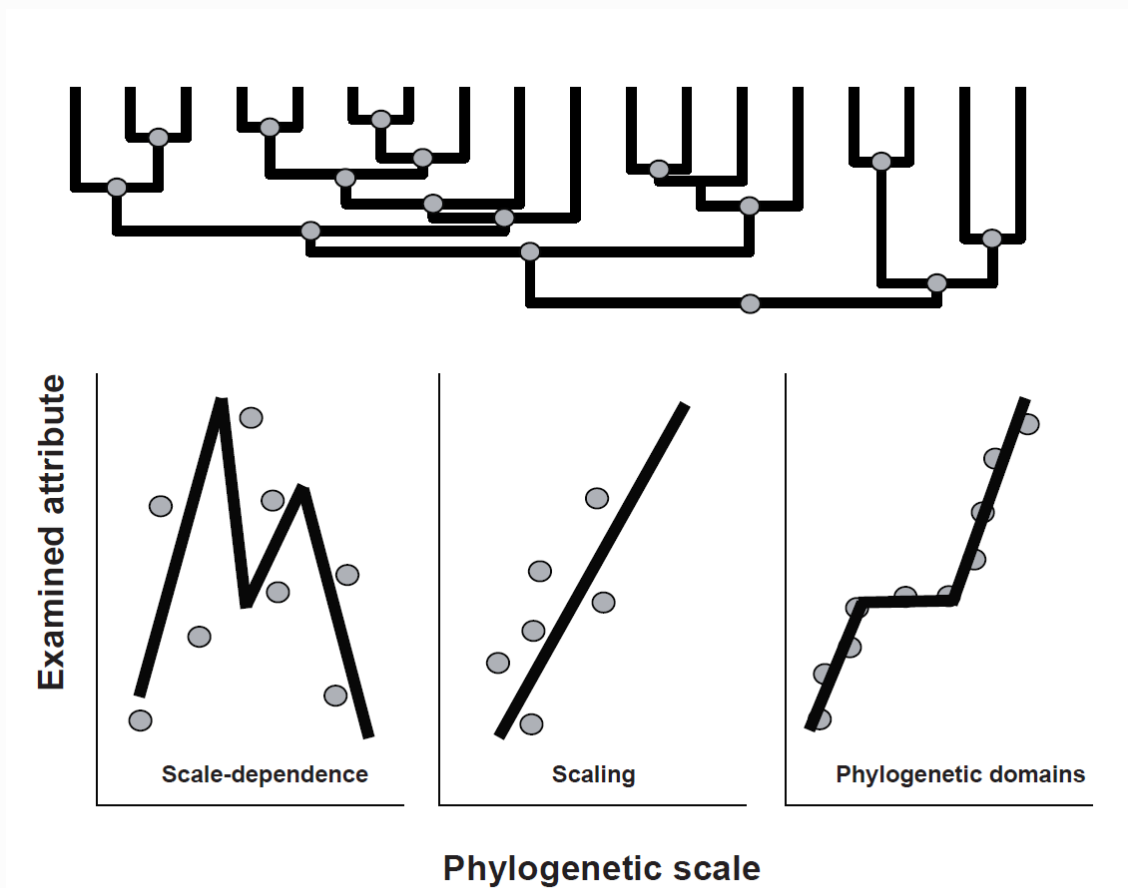

390 **Table 1.** Ecological and evolutionary attributes that vary across phylogenetic scales. Examples of  
 391 methods to evaluate these attributes are also indicated.

| <b>Field</b>                         | <b>Examined attribute</b> | <b>Examples of methods for evaluation</b>                                                                        |
|--------------------------------------|---------------------------|------------------------------------------------------------------------------------------------------------------|
| <b>Evolution and diversification</b> | diversification mode      | coalescent inference to distinguish between accelerations, slowdowns, and saturation (Morlon <i>et al.</i> 2010) |
|                                      | diversification rate      | product-moment estimators (Magallon & Sanderson 2001), equal-splits measures (Jetz <i>et al.</i> 2012)           |
|                                      | slowdown strength         | gamma statistic (Pybus & Harvey 2000)                                                                            |
| <b>Community ecology</b>             | community structure       | phylogenetics (NRI, NTI, MNND, MPD) (Webb <i>et al.</i> 2002)                                                    |
|                                      | phylogenetic diversity    | Faith's PD (Faith 1992)                                                                                          |
| <b>Biogeography and macroecology</b> | relationship form         | linear, polynomial, exponential, lognormal functions                                                             |
|                                      | relationship strength     | Pearson's correlation, Spearman's correlation, regression slope                                                  |
| <b>Niche conservatism</b>            | phylogenetic signal       | Pagel's lambda (Freckleton <i>et al.</i> 2002), Blomberg's K (Blomberg <i>et al.</i> 2003)                       |
|                                      | evolutionary rates        | Brownian motion model (Felsenstein 1985), Ornstein-Uhlenbeck model (Hansen 1997) of trait evolution              |

## 392 **PHYLOGENETIC SCALE IN PRACTICE**

393 The above overview demonstrates that the consideration of phylogenetic scale varies across  
394 fields, both in terms of the approach and the vocabulary. Therefore, it seems of value to find a  
395 common language to discuss and study phylogenetic scale across disciplines. There are two  
396 general approaches with which phylogenetic scale can be considered in ecological and  
397 evolutionary research. One is exploratory, where patterns are identified across a range of  
398 phylogenetic scales and then explained in the light of specific events or mechanisms. The other  
399 approach relies on testing a priori hypotheses, which are based on mechanisms that presumably  
400 take place at a given phylogenetic scale. Both approaches have their strengths and either may be  
401 appropriate, depending on the objective of a given study; however, we advocate the hypotheses  
402 testing approach for most questions.

403 To study the effects of phylogenetic scale, one can evaluate how a specific attribute of  
404 interest (such as diversification rate, niche conservatism, geographic distribution, statistical  
405 relationships) changes with phylogenetic scale. These attributes may vary randomly or  
406 systematically across the phylogeny, be more prevalent at particular scales, or stay unchanged  
407 across a discrete set of mutually nested clades (Box 2). We refer to the latter as a domain of  
408 phylogenetic scale which, in analogy to spatial domains (Wiens 1989), corresponds to a segment  
409 of phylogeny that reveals homogeneity in the attribute of interest. In this section, we consider  
410 conceptual and methodological approaches to explore patterns which are phylogenetic scale-  
411 dependent.

412

### 413 **Choice of phylogenetic scale**

414 While most researchers are aware that the choice of scale can influence inferences about patterns  
415 or processes, all too often the choice of scale, be it spatial, temporal or phylogenetic, is influenced  
416 by data availability or other logistical concerns. Instead, the scale of an investigation should be  
417 chosen based on a specific objective or question whenever possible. For example, phylogenies of  
418 higher taxa may not be appropriate for evaluating the processes of community assembly that  
419 typically take place across small phylogenetic scales. To test the hypothesis that competition  
420 reduces species coexistence, for example, small phylogenetic scales (e.g. genera, or generally  
421 clades where species can reasonably compete) should be preferred to large scales where most



422 species are highly unlikely to compete (e.g. the entire classes, such as birds and mammals).  
423 However, even with a specific question at hand, it can be difficult to choose a single most  
424 appropriate phylogenetic scale. Therefore, evaluating multiple phylogenetic extents or grains  
425 should be considered.

426

### 427 **Multiple phylogenetic scales**

428 Simultaneous consideration of multiple phylogenetic scales may be particularly important in  
429 large phylogenies because different clades within such phylogenies may show different patterns  
430 with respect to the attribute of interest (e.g. diversification rate, the strength of niche  
431 conservatism, patterns of community phylogenetic structure) (Fig. 1). For example, Cetacean  
432 systematists had long been perplexed as to why there is little correspondence between  
433 diversification dynamics estimated from the fossil record and phylogenetic trees (Quental &  
434 Marshall 2010; Slater *et al.* 2010; Morlon *et al.* 2011). The correspondence between the two datasets  
435 emerged only when diversification dynamics were evaluated independently for clades within  
436 cetaceans (whales, dolphins, and porpoises) as opposed to cetaceans as a whole. In this case, each  
437 clade appeared to have its own dynamics which were obscured when the entire tree was  
438 evaluated (Morlon *et al.* 2011).

439 In some cases, it may be difficult or even undesirable to specify, a priori, a specific set of  
440 scales. It might be instead more illuminating to study how the attribute of interest varies across  
441 an inclusive range of scales. There are several approaches, originating in community  
442 phylogenetics, which allow for such cross-scale analyses and return results for each node of the  
443 phylogenetic tree (Leibold *et al.* 2010; Pavoine *et al.* 2010; Borregaard *et al.* 2014). For example, the  
444 method developed by Borregaard *et al.* (2014) identifies nodes whose descendant clades  
445 underwent conspicuous geographic, phenotypic, or ecological shifts. In evolutionary research,  
446 evaluation of all nodes is not uncommon, and multiple tools have been developed to identify  
447 node-specific shifts in diversification rates and clades with conspicuously fast or slow  
448 diversification (Alfaro *et al.* 2009; Rabosky 2014) (Table 1). However, statistical analyses that  
449 would include all nodes of the phylogeny remain relatively scarce (e.g. Machac *et al.* 2012; Machac  
450 *et al.* 2013), and most studies analyze select clades only, despite the often cited concerns that the

451 selection of clades is rarely random, reflects our prior biases, and might influence the analysis  
452 profoundly (e.g. Phillimore & Price 2008; Cusimano & Renner 2010; Pennell *et al.* 2012).

453 Two potential issues associated with the evaluation of all nodes are data non-  
454 independence and nestedness. Non-independence can be readily accommodated by the widely  
455 used comparative methods (e.g. PIC, PGLS) (Hurlbert 1984; Felsenstein 1985; Freckleton *et al.*  
456 2002; Rohlf 2006). These methods typically estimate the same parameters as their conventional  
457 counterparts (e.g. intercepts, regression slopes, group means) but adjust the confidence intervals  
458 for these parameters based on the inferred degree of phylogenetic correlation in the data  
459 (Hurlbert 1984; Felsenstein 1985; Freckleton *et al.* 2002; Rohlf 2006). The nestedness of the data is  
460 more difficult to accommodate. For example, the diversification rate of a clade is inherently  
461 determined by the rate values across its constituent subclades. Nestedness therefore extends  
462 beyond the phylogenetic correlation of rate values and reflects how the value for a clade is  
463 produced by the subclade values. This information cannot be readily accommodated under the  
464 currently available comparative methods whose phylogenetic corrections consequently cannot  
465 guarantee proper estimates of statistical significance across nested data. For these reasons, we  
466 argue that parameter estimates can be extracted, compared, and analyzed across nested clades,  
467 but their significance needs to be interpreted cautiously. New theory that would illuminate how  
468 different attributes of interest (e.g. diversification rates, regression slopes, phylogenetic signal)  
469 combine and compound across nested hierarchies, as well as the methods to capture these  
470 correlations, are clearly needed.

471

## 472 **Phylogenetic scaling**

473 Statistical methods that evaluate all clades (nodes) in a given phylogeny (Leibold *et al.* 2010;  
474 Borregaard *et al.* 2014; Rabosky 2014) can be used to explore phylogenetic scaling. Scaling is a  
475 systematic trend along the scale axis in the attribute of interest. For example, diversification rate  
476 or net relatedness index (NRI) (Webb *et al.* 2002) may change systematically with increasing  
477 phylogenetic scale (Cavender-Bares *et al.* 2009; Vamosi *et al.* 2009).

478 Phylogenetic scaling should be most prevalent across mutually nested clades because the  
479 patterns associated with larger clades are determined by the patterns of clades nested within them  
480 (or vice versa). For example, diversification rate of a clade is determined by the rate values of its

481 subclades, similarly as species richness of a spatial plot is determined by the richness of its  
482 subplots. Consequently, it should be possible to predict the value of an attribute (e.g.  
483 diversification rate, regression slopes, phylogenetic signal) at a particular phylogenetic scale from  
484 the knowledge of those values across other scales, much like it is possible to estimate species  
485 richness within large geographic areas, based on the knowledge of richness within small areas  
486 (Harte *et al.* 2009; Storch *et al.* 2012). When characterized mathematically, phylogenetic scaling  
487 should allow for predictions across phylogenetic scales not covered by the phylogeny at hand  
488 (i.e. upscaling or downscaling).

489

### 490 **Domains of phylogenetic scale**

491 When moving along the scale axis, the values of an attribute might sometimes change abruptly.  
492 Such discontinuities provide the opportunity to delimit the domains of phylogenetic scale (Box 2).  
493 Domains are discrete segments of a phylogeny, such as monophyletic clades, taxonomic ranks,  
494 or tree depth, which show homogeneity in the attribute of interest (i.e. diversification rate,  
495 statistical correlation, or phylogenetic signal). By definition, the attribute stays largely unchanged  
496 within a domain but varies substantially between domains. Phylogenetic domains may therefore  
497 provide insights into the processes which operate over different segments of a phylogenetic tree.

498 Traditionally, phylogenetic domains were delimited by taxonomists whose objective was  
499 to organize species into biologically meaningful units, such as families, orders, or classes. These  
500 units are based mostly on morphological and ecological attributes. However, phylogenetic  
501 domains can also consist of clades that show diversification homogeneity, similar rates of  
502 morphological evolution, or similar life-history trade-offs. Therefore, the domains may be  
503 delimited based on key innovations, episodes of historical dispersals, or extinction events, but  
504 also statistically, using quantitative methods without the prior knowledge of the evolutionary  
505 history of a clade. While the statistical approach may be more transparent and reproducible, the  
506 resulting domains may be harder to interpret biologically. Nonetheless, statistically delimited  
507 domains may reveal otherwise unnoticed evolutionary events and potentially important breaks  
508 in the clade's history that may have shaped its extant diversity.

509 Phylogenetic domains may further facilitate statistical inference, given that most  
510 comparative methods assume that the analyzed attributes are largely homogeneous (e.g.

511 regression slopes do not vary across genera within the analyzed family, diversification is  
512 homogenous across the analyzed lineages) and return spurious results when applied to clades  
513 that show a mixture of patterns and processes (Morlon *et al.* 2011; O'Meara 2012; Rabosky &  
514 Goldberg 2015). Phylogenetic domains may therefore identify when comparative methods report  
515 reasonably reliable results and when their conclusions must be interpreted with caution because  
516 the results span different domains and the underlying assumptions have been violated.

517

## 518 CONCLUSION

519 It is well established that different processes dominate over different spatial and temporal scales.  
520 Phylogenetic scale, however, has received limited attention although much research in ecology  
521 and evolution relies on molecular phylogenies (Table 1). Explicit consideration of phylogenetic  
522 scale, scale dependence, phylogenetic scaling, and the domains of phylogenetic scale can  
523 therefore inform multiple disciplines in the field (e.g. diversification analysis, community  
524 ecology, biogeography and macroecology).

525 We have discussed phylogenetic scale largely in isolation from spatial and temporal  
526 scales, but these types of scale will often be related. For instance, competitive exclusion may be  
527 prominent among closely related species within local communities over short time periods  
528 (Cavender-Bares *et al.* 2009). In contrast, plate tectonics might influence deeper nodes in a  
529 phylogeny and operate over broad geographic and temporal scales (Ricklefs 1985; Willis &  
530 Whittaker 2002). In some notable cases, however, the scales may not be related. Diversity  
531 anomalies, such as New Caledonia or Madagascar, represent examples of decoupling where rich  
532 biotas that encompass extensive phylogenetic scales diversified in a relatively small region  
533 (Warren *et al.* 2010; Espeland & Murienne 2011). In contrast, recent radiations within grasses and  
534 rodents have had a large geographic footprint but encompass only limited phylogenetic scales  
535 (Edwards *et al.* 2010). Evaluating when different types of scale are coupled (or decoupled) may  
536 yield new insights into the evolutionary history of different clades and regions (Willis &  
537 Whittaker 2002).

538 We hope that the perspective presented here will spur further theoretical, empirical, and  
539 methodological research. Explicit consideration of phylogenetic scale may turn our focus away  
540 from the importance of particular mechanisms (diversification, trait evolution, niche

541 conservatism) toward the appreciation for the interplay of multiple processes which together, but  
542 over different phylogenetic scales, shape the diversity of life.

543

#### 544 **ACKNOWLEDGEMENTS**

545 Funding was provided by the NSF program Dimensions of Biodiversity (DEB-1136586) and by  
546 the Grant Agency of the Czech Republic (14-36098G).

547

#### 548 **REFERENCES**

549 Ackerly, D. D., D. W. Schwilk, and C. O. Webb. 2006. Niche evolution and adaptive radiation: testing the order of trait  
550 divergence. *Ecology* 87:50–61.

551 Alfaro, M. E., F. Santini, C. Brock, H. Alamillo, A. Dornburg, D. L. Rabosky, G. Carnevale, et al. 2009. Nine exceptional  
552 radiations plus high turnover explain species diversity in jawed vertebrates. *Proceedings of the National Academy*  
553 *of Sciences of the United States of America* 106:13410–13414.

554 Benton, M. J., and B. C. Emerson. 2007. How did life become so diverse? The dynamics of diversification according to  
555 the fossil record and molecular phylogenetics. *Palaeontology* 50:23–40.

556 Blomberg, S. P., T. Garland, and A. R. Ives. 2003. Testing for phylogenetic signal in comparative data: behavioral traits  
557 are more labile. *Evolution* 57:717–745.

558 Borregaard, M. K., C. Rahbek, J. Fjeldså, J. L. Parra, R. J. Whittaker, and C. H. Graham. 2014. Node-based analysis of  
559 species distributions. *Methods in Ecology and Evolution* 5:1225–1235.

560 Buckley, H. L., T. E. Miller, A. M. Ellison, and N. J. Gotelli. 2003. Reverse latitudinal trends in species richness of pitcher-  
561 plant food webs. *Ecology Letters* 6:825–829.

562 Buckley, L. B., T. J. Davies, D. D. Ackerly, N. J. B. Kraft, S. P. Harrison, B. L. Anacker, H. V. Cornell, et al. 2010.  
563 Phylogeny, niche conservatism and the latitudinal diversity gradient in mammals. *Proceedings of the Royal Society*  
564 *of London B: Biological Sciences*: rspb20100179.

565 Cadotte, M., C. H. Albert, and S. C. Walker. 2013. The ecology of differences: assessing community assembly with trait  
566 and evolutionary distances. *Ecology Letters* 16:1234–1244.

567 Cahill, A. E., M. E. Aiello-Lammens, M. C. Fisher-Reid, X. Hua, C. J. Karanewsky, H. Y. Ryu, G. C. Sbeglia, et al. 2012.  
568 How does climate change cause extinction? *Proceedings of the Royal Society B: Biological Sciences*: rspb20121890.

569 Cavender-Bares, J., A. Keen, and B. Miles. 2006. Phylogenetic structure of Floridian plant communities depends on  
570 taxonomic and spatial scale. *Ecology* 87:S109–122.

571 Cavender-Bares, J., K. H. Kozak, P. V. A. Fine, and S. W. Kembel. 2009. The merging of community ecology and  
572 phylogenetic biology. *Ecology Letters* 12:693–715.

573 Cook, R. E. 1969. Variation in species density of North American birds. *Systematic Zoology* 18:63–84.

574 Cornell, H. V., and S. P. Harrison. 2014. What are species pools and when are they important? *Annual Review of*

- 575 Ecology, Evolution, and Systematics 45:45–67.
- 576 Cotgreave, P., and P. Stockley. 1994. Body size, insectivory and abundance in assemblages of small mammals. *Oikos*  
577 71:89–96.
- 578 Damuth, J. 1981. Population density and body size in mammals. *Nature* 290:699–700.
- 579 Daniel L Rabosky, G. J. S. 2012. Clade age and species richness are decoupled across the Eukaryotic Tree of Life. *PLoS*  
580 *biology* 10:e1001381.
- 581 Edwards, E. J., C. P. Osborne, C. A. E. Strömberg, S. A. Smith, C4 Grasses Consortium, W. J. Bond, P.-A. Christin, et al.  
582 2010. The origins of C4 grasslands: integrating evolutionary and ecosystem science. *Science* 328:587–591.
- 583 Espeland, M., and J. Muriénne. 2011. Diversity dynamics in New Caledonia: towards the end of the museum model?  
584 *BMC Evolutionary Biology* 11:254.
- 585 Felsenstein, J. 1985. Phylogenies and the comparative method. *American Naturalist* 125:1–15.
- 586 Freckleton, R. P., P. H. Harvey, and M. Pagel. 2002. Phylogenetic analysis and comparative data: a test and review of  
587 evidence. *American Naturalist* 160:712–726.
- 588 Gaston, K. J., T. M. Blackburn, and J. H. Lawton. 1997. Interspecific Abundance-Range Size Relationships: An Appraisal  
589 of Mechanisms. *Journal of Animal Ecology* 66:579–601.
- 590 Gavrillets, S., and J. B. Losos. 2009. Adaptive radiation: Contrasting theory with data. *Science* 323:732–737.
- 591 Gerhold, P., J. F. Cahill, M. Winter, I. V. Bartish, and A. Prinzing. 2015. Phylogenetic patterns are not proxies of  
592 community assembly mechanisms (they are far better). *Functional Ecology* 29:600–614.
- 593 Glor, R. E. 2010. Phylogenetic insights on adaptive radiation. *Annual Review of Ecology, Evolution, and Systematics*  
594 41:251–270.
- 595 Godoy, O., N. J. B. Kraft, and J. M. Levine. 2014. Phylogenetic relatedness and the determinants of competitive  
596 outcomes. *Ecology Letters* 17:836–844.
- 597 Gould SJ. 2002. *The Structure of evolutionary theory*. Harvard University Press, Cambridge, MA.
- 598 Hansen, T. F. 1997. Stabilizing selection and the comparative analysis of adaptation. *Evolution* 51:1341–1351.
- 599 Harmon, L. J., and S. Harrison. 2015. Species diversity is dynamic and unbounded at local and continental scales.  
600 *American Naturalist* 185:584–593.
- 601 Harte, J., A. B. Smith, and D. Storch. 2009. Biodiversity scales from plots to biomes with a universal species–area curve.  
602 *Ecology Letters* 12:789–797.
- 603 Heath, T. A., J. P. Huelsenbeck, and T. Stadler. 2014. The fossilized birth–death process for coherent calibration of  
604 divergence-time estimates. *Proceedings of the National Academy of Sciences* 111:2957–2966.
- 605 Hurlbert, S. H. 1984. Pseudoreplication and the design of ecological field experiments. *Ecological Monographs* 54:187–  
606 211.
- 607 Isaac, N. J. B., D. Storch, and C. Carbone. 2011. Taxonomic variation in size–density relationships challenges the notion  
608 of energy equivalence. *Biology Letters* 7:615–618.
- 609 IUCN 2016. *The IUCN Red List of Threatened Species*.
- 610 Jackson, S. T., and C. Weng. 1999. Late Quaternary extinction of a tree species in eastern North America. *Proceedings*

- 611 of the National Academy of Sciences of the United States of America 96:13847–13852.
- 612 Lessard, J. P. 2012. Inferring local ecological processes amid species pool influences. *Trends in Ecology & Evolution*
- 613 27:600–607.
- 614 Jones, K. E., J. Bielby, M. Cardillo, S. A. Fritz, J. O'Dell, C. D. L. Orme, K. Safi, et al. 2009. PanTHERIA: a species-level
- 615 database of life history, ecology, and geography of extant and recently extinct mammals. *Ecology* 90:2648–2648.
- 616 Jönsson, K. A., P.-H. Fabre, S. A. Fritz, R. S. Etienne, R. E. Ricklefs, T. B. Jørgensen, J. Fjeldså, et al. 2012. Ecological and
- 617 evolutionary determinants for the adaptive radiation of the Madagascan vangas. *Proceedings of the National*
- 618 *Academy of Sciences of the United States of America* 109:6620–6625.
- 619 Kennedy, J. D., J. T. Weir, D. M. Hooper, D. T. Tietze, J. Martens, and T. D. Price. 2012. Ecological limits on
- 620 diversification of the Himalayan Core Corvoidea. *Evolution* 66:2599–2613.
- 621 Kindlman, P., Schodellbauerova, I. & Dixon, A.F.G. (2007). Inverse latitudinal gradients in species diversity. In: *Scaling*
- 622 *Biodiversity*, eds. Storch, D., Marquet, P.A. & Brown, J. H. Cambridge University Press, Cambridge.
- 623 Kindlman, Schodellbauerova, and Dixon. 2007. Inverse latitudinal gradients in species diversity. In: *Scaling*
- 624 *Biodiversity*, ed. David Storch, Pablo A. Marquet and James H. Brown. Cambridge University Press.
- 625 Kozak, K. H., and J. J. Wiens. 2010. Accelerated rates of climatic-niche evolution underlie rapid species diversification.
- 626 *Ecology Letters* 13:1378–1389.
- 627 Laland, K., T. Uller, M. Feldman, K. Sterelny, G. B. Müller, A. Moczek, E. Jablonka, et al. 2014. Does evolutionary theory
- 628 need a rethink? *Nature* 514:161–164.
- 629 Leibold, M. A., E. P. Economo, and P. Peres-Neto. 2010. Metacommunity phylogenetics: separating the roles of
- 630 environmental filters and historical biogeography. *Ecology Letters* 13:1290–1299.
- 631 Levin, S. A. 1992. The Problem of Pattern and Scale in Ecology: The Robert H. MacArthur Award Lecture. *Ecology*
- 632 73:1943–1967.
- 633 Losos, J. B. 2008. Phylogenetic niche conservatism, phylogenetic signal and the relationship between phylogenetic
- 634 relatedness and ecological similarity among species. *Ecology Letters* 11:995–1003.
- 635 Machac, A., Graham, C.H. & Storch, D. Ecological controls of mammalian diversification vary with phylogenetic scale,
- 636 in review.
- 637 Machac A., Storch D., Wiens J. J. (2013) Ecological causes of decelerating diversification in carnivoran mammals.
- 638 *Evolution* 67: 2423-2433.
- 639 Machac A., Storch D., Zrzavy J., Smrckova J. (2012) Temperature dependence of evolutionary diversification:
- 640 differences between two contrasting model taxa support the metabolic theory of ecology. *Journal of Evolutionary*
- 641 *Biology* 25: 2449-2456.
- 642 Marquet, P.A., M. Fernández, S.A. Navarrete & C. Valdovinos (2004) Diversity emerging: Towards a deconstruction of
- 643 biodiversity patterns. In: *Frontiers of Biogeography: New Directions in the Geography of Nature*. Cambridge
- 644 University Press, Cambridge.
- 645 May, R. M. 1974 *Patterns of species abundance and diversity*. Harvard University Press.
- 646 Mayr E. 1942. *Systematics and the origin of species*. Dover, New York.

- 647 McGill, B. J., A. E. K. Roy, and E. M. C. Whitlock. 2008. Exploring Predictions of Abundance from Body Mass Using  
648 Hierarchical Comparative Approaches. *American Naturalist* 172:88–101.
- 649 McGuire, J. A., C. C. Witt, J. V. Remsen Jr., A. Corl, D. L. Rabosky, D. L. Altshuler, and R. Dudley. 2014. Molecular  
650 phylogenetics and the diversification of hummingbirds. *Current Biology* 24:910–916.
- 651 McPeck, M. A. 2008. The ecological dynamics of clade diversification and community assembly. *American Naturalist*  
652 172:270–284.
- 653 Morlon, H., T. L. Parsons, and J. B. Plotkin. 2011. Reconciling molecular phylogenies with the fossil record. *Proceedings*  
654 *of the National Academy of Sciences* 108:16327–16332.
- 655 Morlon, H., M. D. Potts, and J. B. Plotkin. 2010. Inferring the dynamics of diversification: a coalescent approach. *PLoS*  
656 *biology* 8.
- 657 Münkemüller, T., L. Gallien, S. Lavergne, J. Renaud, C. Roquet, S. Abdulkhak, S. Dullinger, et al. 2014. Scale decisions  
658 can reverse conclusions on community assembly processes. *Global ecology and biogeography* 23:620–632.
- 659 Munoz, F., B. R. Ramesh, and P. Coueron. 2014. How do habitat filtering and niche conservatism affect community  
660 composition at different taxonomic resolutions? *Ecology* 95:2179–2191.
- 661 Ndiribe, C., L. Pellissier, S. Antonelli, A. Dubuis, J. Pottier, P. Vittoz, A. Guisan, et al. 2013. Phylogenetic plant  
662 community structure along elevation is lineage specific. *Ecology and Evolution* 3:4925–4939.
- 663 Nilsson, M. A., U. Arnason, P. B. S. Spencer, and A. Janke. 2004. Marsupial relationships and a timeline for marsupial  
664 radiation in South Gondwana. *Gene* 340:189–196.
- 665 O'Meara, B. C. 2012. Evolutionary inferences from phylogenies: a review of methods. *Annual Review of Ecology,*  
666 *Evolution, and Systematics* 43:267–285.
- 667 Owen, D., and J. Owen. 1974. Species diversity in temperate and tropical Ichneumonidae. *Nature* 249:583–584.
- 668 PanTHERIA: A species-level database of life history, ecology, and geography of extant and recently extinct mammals.  
669 *Ecology* 90:2648
- 670 Parra, J. L., J. A. McGuire, and C. H. Graham. 2010. Incorporating clade identity in analyses of phylogenetic community  
671 structure: an example with hummingbirds. *American Naturalist* 176:573–587.
- 672 Parra, J. L., C. Rahbek, J. A. McGuire, and C. H. Graham. 2011. Contrasting patterns of phylogenetic assemblage  
673 structure along the elevational gradient for major hummingbird clades. *Journal of Biogeography* 38:2350–2361.
- 674 Pavoine, S., M. Baguette, and M. B. Bonsall. 2010. Decomposition of trait diversity among the nodes of a phylogenetic  
675 tree. *Ecological Monographs* 80:485–507.
- 676 Pigliucci, M. 2007. Do we need an extended evolutionary synthesis? *Evolution* 61:2743–2749.
- 677 Preston, F. W. 1948. The commonness, and rarity of species. *Ecology* 29:254–283.
- 678 Price, T. D., D. M. Hooper, C. D. Buchanan, U. S. Johansson, D. T. Tietze, P. Alström, U. Olsson, et al. 2014. Niche filling  
679 slows the diversification of Himalayan songbirds. *Nature* 509:222–225.
- 680 Quental, T. B., and C. R. Marshall. 2010. Diversity dynamics: molecular phylogenies need the fossil record. *Trends in*  
681 *Ecology & Evolution* 25:434–441.
- 682 — — —. 2013. How the Red Queen drives terrestrial mammals to extinction. *Science* 341:290–292.



- 683 Rabosky, D. L. 2009. Ecological limits and diversification rate: alternative paradigms to explain the variation in species  
684 richness among clades and regions. *Ecology Letters* 12:735–743.
- 685 — — —. 2014. Automatic detection of key innovations, rate shifts, and diversity-dependence on phylogenetic trees.  
686 *PLoS ONE* 9:e89543.
- 687 Rabosky, D. L., and E. E. Goldberg. 2015. Model inadequacy and mistaken inferences of trait-dependent speciation.  
688 *Systematic Biology* syu131.
- 689 Rabosky, D. L., and A. H. Hurlbert. 2015. Species richness at continental scales is dominated by ecological limits. *The*  
690 *American Naturalist* 185:572–583.
- 691 Rabosky, D. L., and D. R. Matute. 2015. Macroevolutionary speciation rates are decoupled from the evolution of  
692 intrinsic reproductive isolation in *Drosophila* and birds.
- 693 Rabosky, D. L., F. Santini, J. Eastman, S. A. Smith, B. Sidlauskas, J. Chang, and M. E. Alfaro. 2013. Rates of speciation  
694 and morphological evolution are correlated across the largest vertebrate radiation. *Nature Communications* 4: 2958-  
695 2961.
- 696 Rabosky, D. L., G. J. Slater, and M. E. Alfaro. 2012. Clade age and species richness are decoupled across the eukaryotic  
697 tree of life. *PLoS biology* 10:e1001381.
- 698 Rohlf, F. J. 2001. Comparative methods for the analysis of continuous variables: geometric interpretations. *Evolution*  
699 55:2143–2160.
- 700 Rohlf, F. J. 2006. A comment on phylogenetic correction. *Evolution* 60:1509–1515.
- 701 Ronquist, F. 1997. Dispersal-vicariance analysis: a new approach to the quantification of historical biogeography.  
702 *Systematic Biology* 46:195–203.
- 703 Rosenzweig. 1995. Species diversity in space and time. Cambridge University Press.
- 704 Scheiner, S. M. 2000. Species richness, species–area curves and Simpson’s paradox. *Evolutionary Ecology Research*  
705 2:791–802.
- 706 Schneider, D. C. 2001. The rise of the concept of scale in ecology the concept of scale is evolving from verbal expression  
707 to quantitative expression. *BioScience* 51:545–553.
- 708 Šizling, A. L., W. E. Kunin, E. Šizlingová, J. Reif, and D. Storch. 2011. Between geometry and biology: the problem of  
709 universality of the species-area relationship. *American Naturalist* 178:602–611.
- 710 Slater, G. J., S. A. Price, F. Santini, and M. E. Alfaro. 2010. Diversity versus disparity and the radiation of modern  
711 cetaceans. *Proceedings of the Royal Society of B: Biological Sciences* 277:3097–3104.
- 712 Storch, D., P. Keil, and W. Jetz. 2012. Universal species-area and endemics-area relationships at continental scales.  
713 *Nature* 488:78–81.
- 714 Storch, D., and A. L. Šizling. 2008. The concept of taxon invariance in ecology: Do diversity patterns vary with changes  
715 in taxonomic resolution? *Folia Geobotanica* 43:329–344.
- 716 Stuart, A. J. 1991. Mammalian extinctions in the late Pleistocene of northern Eurasia and North America. *Biological*  
717 *Reviews of the Cambridge Philosophical Society* 66:453–562.
- 718 Swenson, N. G., B. J. Enquist, J. Pither, J. Thompson, and J. K. Zimmerman. 2006. The problem and promise of scale

- 719 dependency in community phylogenetics. *Ecology* 87:2418–2424.
- 720 Swenson, N. G., B. J. Enquist, J. Thompson, and J. K. Zimmerman. 2007. The influence of spatial and size scale on  
721 phylogenetic relatedness in tropical forest communities. *Ecology* 88:1770–1780.
- 722 Vamosi, J. C., and S. M. Vamosi. 2010. Key innovations within a geographical context in flowering plants: towards  
723 resolving Darwin’s abominable mystery. *Ecology Letters* 13:1270–1279.
- 724 Vamosi, S. M., S. B. Heard, J. C. Vamosi, and C. O. Webb. 2009. Emerging patterns in the comparative analysis of  
725 phylogenetic community structure. *Molecular Ecology* 18:572–592.
- 726 Warren, B. H., D. Strasberg, J. H. Bruggemann, R. P. Prys-Jones, and C. Thébaud. 2010. Why does the biota of the  
727 Madagascar region have such a strong Asiatic flavour? *Cladistics* 26:526–538.
- 728 Webb, C. O., D. D. Ackerly, M. A. McPeck, and M. J. Donoghue. 2002. Phylogenies and community ecology. *Annual*  
729 *Review of Ecology and Systematics* 33:475–505.
- 730 Wiens, J. A. 1989. Spatial scaling in ecology. *Functional Ecology* 3:385–397.
- 731 Wiens, J. J. 2008. Commentary on Losos (2008): Niche conservatism *deja vu*. *Ecology Letters* 11:1004–1005.
- 732 — — —. 2011. The causes of species richness patterns across space, time, and clades and the role of ecological limits. *The*  
733 *Quarterly Review of Biology* 86:75–96.
- 734 Wiens, J. J., D. D. Ackerly, A. P. Allen, B. L. Anacker, L. B. Buckley, H. V. Cornell, E. I. Damschen, et al. 2010. Niche  
735 conservatism as an emerging principle in ecology and conservation biology. *Ecology Letters* 13:1310–1324.
- 736 Wiens, J. J., and M. J. Donoghue. 2004. Historical biogeography, ecology and species richness. *Trends in Ecology &*  
737 *Evolution* 19:639–644.
- 738 Wiens, J. J., and C. H. Graham. 2005. Niche conservatism: integrating evolution, ecology, and conservation biology.  
739 *Annual Review of Ecology, Evolution, and Systematics* 36:519–539.
- 740 Willis, K. J., and R. J. Whittaker. 2002. Species diversity - scale matters. *Science* 295:1245–1248.
